# Supplementary material
Source: publisher figshare collection journal article supplement (https://tandf.figshare.com/ndownloader/files/21718863)
Supplement: Supplementary file 1 [file 21718863]

**Annex 1.** Actor groups and number of interviews

| **Region** | **Actor Type** | **Number of Respondents** |
| --- | --- | --- |
| Europe | EC | 5 |
|  | Government | 2 |
|  | Importer/ Retailer | 15 |
|  | International Organisation | 7 |
|  | NGO | 15 |
|  | Research | 14 |
|  | Trade Association | 4 |
| **Europe Total** |  | **62** |
| Ghana | Government | 9 |
|  | Manufacturer/Exporter | 35 |
|  | NGO | 20 |
|  | Processor (informal) | 46 |
|  | Village actor | 27 |
|  | Village non-actor | 24 |
| **Ghana Total** |  | **161** |
| Indonesia | Certifier | 8 |
|  | Donor | 3 |
|  | Government | 16 |
|  | Manufacturer/Exporter | 70 |
|  | NGO | 6 |
|  | Processor (formal) | 10 |
|  | Processor (informal) | 5 |
|  | Research | 2 |
|  | Trade Association | 5 |
|  | Trader | 15 |
|  | Village non-actor | 28 |
| **Indonesia Total** |  | **168** |
| **Total** |  | **391** |

**Annex 2**. Descriptors of interviews used in this paper

| **Reference** | **Country** | **Actor Type** |
| --- | --- | --- |
| 01 | Europe | Manufacturer |
| 02 | Europe | Manufacturer |
| 03 | Europe | Manufacturer |
| 04 | Europe | Timber Federation |
| 05 | Europe | Government |
| 06 | Europe | Government |
| 07 | Europe | Importer |
| 08 | Europe | Importer |
| 09 | Europe | Manufacturer |
| 10 | Europe | Importer |
| 11 | Europe | Civil Society |
| 12 | Indonesia | Sub-national government |
| 13 | Indonesia | Furniture manufacturer/exporter |
| 14 | Indonesia | Furniture manufacturer/exporter |
| 15 | Indonesia | National NGO |
| 16 | Indonesia | Furniture manufacturer (SME) |
| 17 | Indonesia | Government (national) |
| 18 | Indonesia | Village actor |
| 19 | Indonesia | Village actor |
| 20 | Indonesia | Village actor |
| 21 | Indonesia | Furniture manufacturer/exporter |
| 22 | Indonesia | Furniture manufacturer/exporter |
| 23 | Indonesia | Furniture manufacturer/exporter |
| 24 | Ghana | International NGO |
| 25 | Ghana | Civil Society |
| 26 | Ghana | Village actor |
| 27 | Ghana | Village actor |
| 28 | Ghana | Exporter/ Trader |
| 29 | Ghana | Exporter/ Trader |
| 30 | Ghana | Exporter/ Trader |
| 31 | Ghana | Government |
| 32 | Ghana | Exporter/ Trader |
| 33 | Ghana | Furniture manufacturer/exporter |
